# Supplementary material for: AhR Activation Ameliorates Intestinal Barrier Damage in Immunostressed Piglets by Regulating Intestinal Flora and Its Metabolism
Source: MDPI journal article supplement (doi:10.3390/ani14050794), 2024-03-04
Supplement: s1 [file s1]

Supplementary Materials

# AhR Activation Ameliorates Intestinal Barrier Damage in Immunostressed Piglets by Regulating Intestinal Flora and Its Metabolism

Xiaomei Wu, Yalei Zhang, Mengyao Ji, Wen Yang, Tanjie Deng, Guanyu Hou, Liguang Shi and Wenjuan Xun

Table S1. Ingredients and nutrient levels of the basal diet (% , as-fed basis).

| Ingredients         | Content | Nutritional level <sup>2</sup> | Content |
|---------------------|---------|--------------------------------|---------|
| Corn                | 55.70   | Digestible energy,<br>MJ/kg    | 14.57   |
| Soybean meal        | 18.80   | Crude protein                  | 20.22   |
| Puffed soybean      | 8.50    | Calcium                        | 0.79    |
| Fish meal           | 5.50    | Total phosphorus               | 0.66    |
| Whey powder         | 4.50    | Lysine                         | 1.52    |
| Soybean oil         | 1.90    | Methionine                     | 0.50    |
| Sucrose             | 1.88    | Threonine                      | 0.86    |
| CaHPO <sub>4</sub>  | 0.70    | Tryptophan                     | 0.29    |
| Limestone           | 0.60    |                                |         |
| L-lysine            | 0.33    |                                |         |
| DL-methionine       | 0.14    |                                |         |
| L-threonine         | 0.05    |                                |         |
| L-tryptophan        | 0.05    |                                |         |
| NaCl                | 0.35    |                                |         |
| Premix <sup>1</sup> | 1.00    |                                |         |
| Total               | 100.00  |                                |         |

<sup>1</sup> The premix provides per kilogram of feeding: VA 9 000 IU, VD3 1 200 IU, VE 65 IU, VK3 2.5 mg, VB<sub>1</sub> 2.5 mg, VB<sub>2</sub> 6.0 mg, VB<sub>12</sub> 0.03 mg, niacin 25 mg, pantothenic acid 22 mg, biotin 0.2 mg, folic

acid 1.5 mg, copper 80 mg, iron 120 mg, manganese 45 mg, zinc 120 mg, Selenium 0.3 mg, iodine 0.3 mg.

<sup>2</sup> All nutrient levels were measured values except for digestible energy.

**Table S2. The primers employed in real-time quantitative PCR were utilized.**

| Gene          | Sequences                             | Product size | Accession numbers |
|---------------|---------------------------------------|--------------|-------------------|
| ZO-1          | Forward:5'GAGGATGGTCACACCGTGGT3'      | 169          | XM003353439.1     |
|               | Reverse:5'GGAGGATGCTGTTGTCTCGG3'      |              |                   |
| Occludin      | Forward:5'ATGCTTTCTCAGCCAGCGTA3'      | 176          | NM_001163647.1    |
|               | Reverse:5'AAGGTTCCATAGCCTCGGTC3'      |              |                   |
| Claudin1      | Forward:5'GGAATAATAGCCATCTTTGT3'      | 88           | NM_001161635.1    |
|               | Reverse:5'CAGCCATCCGCATCTTCT3'        |              |                   |
| IL-1 $\beta$  | Forward:5'ACCTGGACCTTGTTCTC3'         | 124          | NM_214055.1       |
|               | Reverse:5'GGATTCTTCATCGGCTTC3'        |              |                   |
| TNF- $\alpha$ | Forward:5'ACGCTCTTCTGCCTACTGC3'       | 162          | NM_214022.1       |
|               | Reverse:5'TCCCTCGGCTTTGACATT3'        |              |                   |
| IL-10         | Forward:5'CACTGCTCTATTGCCTGATCTTCC3'  | 136          | NM_214041.1       |
|               | Reverse:5'AAACTCTTCACTGGGCCGAAG3'     |              |                   |
| IL-6          | Forward: 5'TTCAGTCCAGTCGCCTTCT3'      | 91           | NM_214399.1       |
|               | Reverse:5'GTGGCATCACCTTTGGCATCTTCTT3' |              |                   |
| GAPDH         | Forward:5'GAAGGTCGGAGTGAACGGAT3'      | 149          | AF017079          |
|               | Reverse:5'CATGGGTAGAATCATACTGGAACA3'  |              |                   |

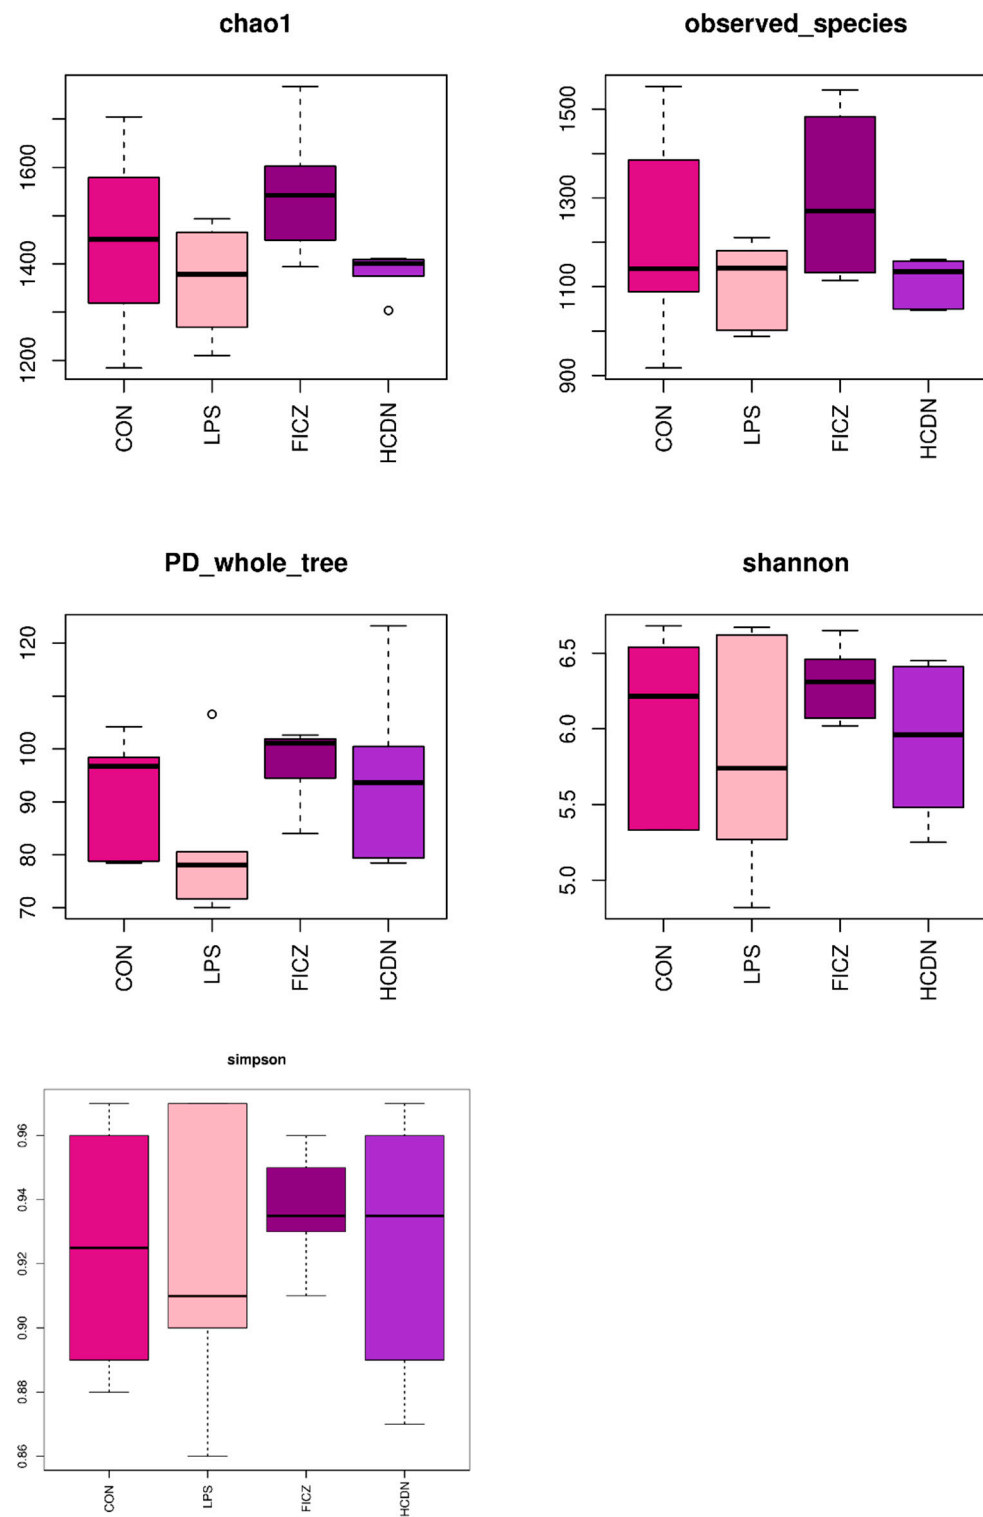

Figure S1. alpha diversity index
